# Supplementary material
Source: PubMed Central journal article supplement (PMC2766358)
Supplement: NIHMS106438-supplement-Supplementary_Data.pdf [file NIHMS106438-supplement-Supplementary_Data.pdf]

Table 2: Summary of the  $^1\text{H}$  and  $^{15}\text{N}$  NMR chemical shifts for WT hPRL and H180A hPRL mutants from the  $^1\text{H}$ - $^{15}\text{N}$  HSQC NMR spectrum.

| WT    | pH   | H27                        |                              |                           |                         | H30                        |                              |                           |                         | H46                        |                              |                           |                         | H59                        |                              |                           |                         | H138                       |                              |                           |                         | H173                       |                              |                           |                         | H180                       |                              |                           |                         | H195                       |                              |                           |                         |
|-------|------|----------------------------|------------------------------|---------------------------|-------------------------|----------------------------|------------------------------|---------------------------|-------------------------|----------------------------|------------------------------|---------------------------|-------------------------|----------------------------|------------------------------|---------------------------|-------------------------|----------------------------|------------------------------|---------------------------|-------------------------|----------------------------|------------------------------|---------------------------|-------------------------|----------------------------|------------------------------|---------------------------|-------------------------|----------------------------|------------------------------|---------------------------|-------------------------|
|       |      | $^{15}\text{N}_{\delta_1}$ | $^{15}\text{N}_{\epsilon_2}$ | $^1\text{H}_{\epsilon_1}$ | $^1\text{H}_{\delta_2}$ |
|       | 4.22 | 179.63                     | 173.53                       | 8.56                      | 7.33                    |                            |                              |                           |                         | 176.87                     | 173.62                       | 8.52                      | 7.19                    | 179.69                     | 176.05                       | 8.73                      |                         |                            |                              |                           | 177.25                  | 173.53                     | 8.13                         | 6.80                      | 186.66                  | 174.40                     | 8.44                         | 7.18                      |                         |                            |                              |                           |                         |
|       | 4.49 | 180.79                     | 173.59                       | 8.55                      | 7.34                    |                            |                              |                           |                         | 177.30                     | 173.60                       | 8.52                      | 7.18                    | 181.02                     | 176.33                       | 8.74                      | 7.45                    |                            |                              |                           |                         | 178.47                     | 173.59                       | 8.09                      | 6.77                    | 190.20                     | 174.87                       | 8.38                      | 7.13                    |                            |                              |                           |                         |
|       | 5.15 | 184.11                     | 174.25                       | 8.51                      | 7.32                    | 188.87                     |                              | 7.67                      |                         | 179.13                     | 174.16                       | 8.48                      | 7.17                    | 185.69                     | 180.00                       | 8.70                      |                         |                            |                              |                           |                         | 181.69                     | 174.25                       | 7.88                      | 6.73                    | 199.02                     | 176.47                       | 8.22                      | 6.99                    |                            |                              | 181.32                    | 8.48                    |
|       | 5.82 | 190.35                     | 176.96                       | 8.38                      | 7.28                    | 188.26                     | 208.71                       | 7.68                      | 6.95                    | 184.73                     | 176.06                       | 8.39                      | 7.14                    | 195.94                     | 182.14                       | 8.54                      | 7.46                    |                            |                              |                           |                         | 223.19                     | 184.05                       | 7.72                      | 6.72                    | 209.29                     | 179.56                       | 7.99                      | 6.86                    |                            |                              | 189.10                    | 8.12                    |
|       | 6.03 | 190.63                     | 177.41                       | 8.37                      | 7.27                    | 188.13                     | 208.25                       | 7.69                      | 6.94                    | 185.84                     | 176.53                       | 8.37                      | 7.13                    | 196.95                     | 182.92                       | 8.50                      | 7.44                    |                            |                              |                           |                         | 223.15                     | 184.38                       | 7.72                      | 6.71                    | 208.67                     | 179.76                       | 8.00                      | 6.86                    |                            |                              | 190.02                    | 8.08                    |
|       | 6.14 | 192.54                     | 178.70                       | 8.33                      | 7.26                    | 188.40                     | 209.95                       | 7.65                      | 6.93                    | 188.61                     | 177.50                       | 8.31                      | 7.11                    | 201.88                     | 184.26                       | 8.41                      | 7.41                    |                            |                              |                           |                         | 224.31                     | 184.74                       | 7.69                      | 6.70                    | 210.88                     | 180.69                       | 7.95                      | 6.83                    |                            |                              | 191.99                    | 8.01                    |
|       | 6.33 | 194.59                     | 180.05                       | 8.28                      | 7.24                    | 188.73                     | 211.65                       | 7.62                      | 6.92                    | 191.74                     | 178.64                       | 8.25                      | 7.09                    | 189.07                     | 178.64                       | 8.25                      | 7.09                    |                            |                              |                           |                         | 225.27                     | 185.07                       | 7.67                      | 6.70                    | 212.96                     | 181.66                       | 7.89                      | 6.81                    | 207.75                     |                              | 193.87                    | 7.94                    |
|       | 6.52 | 197.85                     | 182.19                       | 8.21                      | 7.21                    | 188.82                     | 214.37                       | 7.57                      | 6.90                    | 196.60                     | 180.41                       | 8.16                      | 7.06                    | 190.19                     | 179.00                       |                           |                         |                            |                              |                           |                         | 226.38                     | 185.49                       | 7.65                      | 6.70                    | 216.06                     | 183.07                       | 7.82                      | 6.77                    |                            |                              | 195.86                    | 7.85                    |
|       | 6.76 | 202.12                     | 185.02                       | 8.11                      | 7.17                    | 188.40                     | 217.65                       | 7.52                      | 6.88                    | 202.65                     | 182.65                       | 8.04                      | 7.02                    | 191.29                     | 178.83                       |                           |                         |                            |                              |                           |                         | 227.32                     | 185.85                       | 7.62                      | 6.70                    | 218.80                     | 184.48                       | 7.75                      | 6.74                    | 206.11                     |                              | 197.38                    | 7.77                    |
|       | 7.06 | 207.00                     | 188.92                       | 8.00                      | 7.13                    | 188.00                     | 221.18                       | 7.48                      | 6.87                    | 210.22                     | 185.47                       | 7.89                      | 6.96                    | 194.93                     | 177.5                        |                           |                         |                            |                              |                           |                         | 227.76                     | 185.88                       | 7.61                      |                         | 221.06                     | 186.12                       | 7.69                      | 6.71                    |                            |                              | 199.85                    | 7.71                    |
|       | 7.14 | 207.11                     | 189.36                       | 7.98                      | 7.13                    | 188.71                     | 220.94                       | 7.48                      | 6.86                    | 211.10                     | 185.67                       | 7.88                      | 6.96                    |                            |                              |                           |                         |                            |                              |                           |                         | 227.75                     | 186.02                       | 7.61                      |                         | 221.32                     | 186.30                       | 7.68                      | 6.71                    |                            |                              | 199.76                    | 7.71                    |
|       | 7.52 | 211.59                     | 193.13                       | 7.87                      | 7.08                    | 187.82                     | 224.51                       | 7.45                      | 6.86                    | 216.98                     | 187.82                       | 7.76                      | 6.92                    |                            |                              |                           |                         |                            |                              |                           |                         |                            |                              |                           |                         | 222.95                     | 187.63                       | 7.63                      | 6.68                    |                            |                              |                           |                         |
|       | 7.96 | 214.20                     | 195.73                       | 7.80                      | 7.06                    | 187.00                     | 226.59                       | 7.42                      | 6.89                    | 220.38                     | 189.02                       | 7.69                      | 6.89                    |                            |                              |                           |                         |                            |                              |                           |                         |                            |                              |                           |                         | 223.79                     | 188.45                       | 7.60                      | 6.66                    |                            |                              |                           |                         |
| H180A | pH   | H27                        |                              |                           |                         | H30                        |                              |                           |                         | H46                        |                              |                           |                         | H59                        |                              |                           |                         | H138                       |                              |                           |                         | H173                       |                              |                           |                         | H180                       |                              |                           |                         | H195                       |                              |                           |                         |
|       | 4.40 | 180.64                     | 173.67                       | 8.57                      | 7.34                    | 177.63                     | 179.26                       | 8.58                      | 7.18                    | 177.34                     | 173.82                       | 8.52                      | 7.18                    | 180.99                     | 176.55                       | 8.74                      | 7.45                    |                            |                              |                           |                         | 203.14                     | 178.56                       | 8.12                      | 6.76                    |                            |                              |                           |                         |                            |                              |                           |                         |
|       | 4.94 | 182.86                     | 174.39                       | 8.52                      | 7.32                    | 181.52                     | 186.25                       | 8.43                      | 7.13                    | 178.60                     | 173.93                       | 8.50                      | 7.18                    | 184.47                     | 178.04                       | 8.74                      | 7.49                    |                            |                              |                           |                         | 213.51                     | 180.99                       | 7.93                      | 6.72                    |                            |                              |                           |                         |                            |                              |                           |                         |
|       | 6.02 | 190.51                     | 178.69                       | 8.37                      | 7.26                    | 185.19                     | 203.06                       | 8.05                      | 6.98                    | 186.81                     | 177.30                       | 8.35                      | 7.12                    | 198.81                     | 183.30                       | 8.47                      | 7.43                    |                            |                              |                           |                         | 224.85                     | 184.84                       | 7.70                      | 6.70                    |                            |                              |                           |                         | 190.69                     |                              | 8.09                      |                         |
|       | 6.34 | 193.29                     | 180.75                       | 8.29                      | 7.23                    | 185.76                     | 208.53                       | 7.93                      | 6.94                    | 192.02                     | 178.81                       | 8.25                      | 7.09                    | 205.27                     | 185.05                       | 8.33                      |                         |                            |                              |                           |                         | 226.30                     | 185.06                       | 7.66                      | 6.70                    |                            |                              |                           |                         | 194.19                     |                              | 7.95                      |                         |
|       | 6.83 | 202.55                     | 187.93                       | 8.07                      | 7.14                    | 186.42                     | 219.25                       | 7.72                      | 6.86                    | 206.93                     | 184.25                       | 7.96                      | 6.99                    |                            |                              |                           |                         |                            |                              |                           |                         | 228.30                     | 186.04                       | 7.62                      | 6.70                    |                            |                              |                           |                         | 199.18                     |                              | 7.75                      |                         |
|       | 7.45 | 208.77                     | 193.71                       | 7.91                      | 7.08                    | 186.35                     | 224.75                       | 7.64                      | 6.81                    | 215.91                     | 187.49                       | 7.80                      | 6.93                    |                            |                              |                           |                         |                            |                              |                           |                         | 228.63                     | 187.31                       | 7.60                      | 6.69                    |                            |                              |                           |                         | 202.29                     |                              | 7.68                      |                         |
